# Supplementary material
Source: PubMed Central journal article supplement (PMC4675629)
Supplement: NIHMS741542-supplement-Supp_Fig_S1-S2___Table_S1-4.pdf [file NIHMS741542-supplement-Supp_Fig_S1-S2___Table_S1-4.pdf]

```

M1 rocA MLEDFLQFLGFIFLDIIEIMLTLKLSFVSAIPLRLKNIFYLSLSMVLQVVFWAFFPDHFILDVVMLAQFLFFALIALY
M3 rocA MLEDFLQFLGFIFLDIIEIMLTLKLSFVSAIPLRLKNIFYLSLSMVLQVVFWAFFPDHFILDVVMLAQFLFFALIALY
*****

M1 rocA YGKSIKAKFLMFYAFFPLVSI SLVKRFIVFFVMPLFGMPYSVVKHNTLLIYSITCFSIFLIYRCIQVFHFDSTWRQYFQ
M3 rocA YGKSIKAKFLMFYAFFPLVSI SLVKRFIVFFVMPLFGMPYSVVKHNTLLIYSITCFSIFLIYRCIQVFHFDSTWRQYFQ
*****

M1 rocA SHRASKLLVFTNSSMALYYLCVQGDVMSPSLSGLATTARSIIVLFYFILFLTLIHLERYVKQNSIEAIVQQKEYREL
M3 rocA SHRASKLLVFTNSSMALYYLCVQGDVMSPSLSGLATTARSNIVLFYFILFLTLIHLERYVKQNSIEAIVQQKEYREL
*****

M1 rocA INYSQHGLLQDIQELRRLTTVSSRLKIGIEQNDISIVRLTYEGILNAEKNNAKDDRDLTCLDKLQVEAIRHIVLAK
M3 rocA INYSQHGLLQDIQELRQLTTVSSRLKIGIEQNDISIVRLTYEGILNAEKNNAKDDRDLTCLDKLQVEAIRHIVLAK
*****

M1 rocA LIEAKNKKLVEVSI PNCIATFFLEVVDFTKLLSFLLDNAIEMSLETKQPCLSI AFLDQNHKLVIVIQSSTKQGQDSDS
M3 rocA LIEAKNKKLVEVSI PNCIATFFLEVVDFTKLLSFLLDNAIEMSLETKQPCLSI AFLDQNHKLVIVIQSSTKQGQDSDS
*****

M1 rocA VFAIPALKKRDDWQFDRNVTTILNRYDYLTISSQIHDGILTQLIEIAKPD
M3 rocA VFATPALKKEMTGNLT-----
*** *****. :

```

**Figure S1**  
**RocA sequence alignment from representative serotype M1 and M3 GAS isolates.** Red asterisks highlight amino acid identity, gaps highlight dissimilar amino acids, periods highlight weakly similar amino acids, and colons highlight strongly similar amino acids.

```

M1 rocA CTTATGATAAAAATAAGAATATGATTTAAATGAAAAGCTCAGTTTATCTATTACGGAGTTCGAAATGAAAAGAAAATCG
M3 rocA CTTATGATAAAAATAAGAATATGATTTAAATGAAAAGCTCAGTTTATCTATTACGGAGTTCGAAATGAAAAGAAAATCG
*****

M1 rocA AGATGTGATAACATATTTTGAACGAGAAGGAGAAGGATAAATGTTAGAAGATTTTCTCAATTTTATAGGATTTATATTTT
M3 rocA AGATGTGATAACATATTTTGAACGAGAAGGAGAAGGATAAATGTTAGAAGATTTTCTCAATTTTATAGGATTTATATTTT
*****

M1 rocA TAGATATTATTGAAATATGTTAACGTTAAAGCTTTTGTAGCTTTGTAAGTGAATTCGCTTCGCCTGAAAAATATTTTT
M3 rocA TAGATATTATTGAAATATGTTAACGTTAAAGCTTTTGTAGCTTTGTAAGTGAATTCGCTTCGCCTGAAAAATATTTTT
*****

M1 rocA TATTTATCACTTAGTATGGTTTTGTTTCAAGTAGTTTTTTGGGCTTTCCTTCCAGACCATTTCATTCCTGATGTTGTGAT
M3 rocA TATTTATCACTTAGTATGGTTTTGTTTCAAGTAGTTTTTTGGGCTTTCCTTCCAGACCATTTCATTCCTGATGTTGTGAT
*****

M1 rocA GTTGGCTCAGTTTCTTTTCTTGGCCTTATAGCCCTATACTATGGTAAATCAATAAAAGCTAAGTTTTTAATGTTTTATG
M3 rocA GTTGGCTCAGTTTCTTTTCTTGGCCTTATAGCCCTATACTATGGTAAATCAATAAAAGCTAAGTTTTTAATGTTTTATG
*****

M1 rocA CCTTTTTCCACTAGTGTCTATTAGTTGGTTAAGCGATTTATTGTATTTTTTGTATGCCATTGTTGGTATGCCTTAT
M3 rocA CCTTTTTCCACTAGTGTCTATTAGTTGGTTAAGCGATTTATTGTATTTTTTGTATGCCATTGTTGGTATGCCTTAT
*****

M1 rocA TCAGTTGTTAAACATAATACTACTGATTTACAGCATTACTTGTTTTAGTATTTTTTTGATTTATCGCTGCATTCAAGT
M3 rocA TCAGTTGTTAAACATAATACTACTGATTTACAGCATTACTTGTTTTAGTATTTTTTTGATTTATCGCTGCATTCAAGT
*****

M1 rocA TTTTCATTTTCGATTTTCAACCTGGCGCCAATATTTTCAATCACATAGAGCTAGTAAACTATTAGTGTTTACTAACTCTT
M3 rocA TTTTCATTTTCGATTTTCAACCTGGCGCCAATATTTTCAATCACATAGAGCTAGTAAACTATTAGTGTTTACTAACTCTT
*****

M1 rocA CGATGGCTCTATATTACTTGTGTGTCCAAGGATAGATGTGATGTCGCCTTCTTTATCAGGACTTGCTACAACGACTGCT
M3 rocA CGATGGCTCTATATTACTTGTGTGTCCAAGGATAGATGTGATGTCGCCTTCTTTATCAGGACTTGCTACAACGACTGCT
*****

M1 rocA CGTTCAATCATAGTGTCTTTTATTTTCATTTTGTTCCTACTTTATTAATTCATTTAGAGCGTTATGTAACAAAATC
M3 rocA CGTTCAACATAGTGTCTTTTATTTTCATTTTGTTCCTACTTTATTAATTCATTTAGAGCGTTATGTAACAAAATC
*****

M1 rocA TATTGAGGCAATGTGCAACAAAAGAATATCGTGAGCTGATTAATATAGTCAGCACCTGGATTGCTGTATCAAGATA
M3 rocA TATTGAGGCAATGTGCAACAAAAGAATATCGTGAGCTGATTAATATAGTCAGCACCTGGATTGCTGTATCAAGATA
*****

M1 rocA TTCAAGAGCTTAGGCGGCTATTAACCTACCGTGTCTAGTCGTCTTAAGATTGGAATCGAACAAAATGATATCTCTATTGTG
M3 rocA TTCAAGAGCTTAGGCGGCTATTAACCTACCGTGTCTAGTCGTCTTAAGATTGGAATCGAACAAAATGATATCTCTATTGTG
*****

M1 rocA AGACTTACTTATGAAGGTATCTTGAATGCTGAAAAGAATAATGCTAAAGATGACAGACTTGATTAACTTGTTTAGATAA
M3 rocA AGACTTACTTATGAAGGTATCTTGAATGCTGAAAAGAATAATGCTAAAGATGACAGACTTGATTAACTTGTTTAGATAA
*****

M1 rocA ATTACAAGTTGAAGCAATCAGACATATTGTTTGTAGCTAAATTAATGAGGCAAAAATAAGAGCTTAAGGTTGAGGTAT
M3 rocA ATTACAAGTTGAAGCAATCAGACATATTGTTTGTAGCTAAATTAATGAGGCAAAAATAAGAGCTTAAGGTTGAGGTAT
*****

M1 rocA CGATCCCTAATGTATTGCAACGTTTTTCTAGAAGTAGTAGATTTCACTAAGCTATTGTCATTTTGTAGATAATGCT
M3 rocA CGATCCCTAATGTATTGCAACGTTTTTCTAGAAGTAGTAGATTTCACTAAGCTATTGTCATTTTGTAGATAATGCT
*****

M1 rocA ATAGAAATGAGTTGGAGACAAAGCAACCTTGCTTATCAATAGCATTCTGGATCAAAACCATAAACTTGTCATAGTCAT
M3 rocA ATAGAAATGAGTTGGAGACAAAGCAACCTTGCTTATCAATAGCATTCTGGATCAAAACCATAAACTTGTCATAGTCAT
*****

M1 rocA TCAAAGCAGTACTAAACAAGGACAAGATGATAGTCAAAGCGTGTGCTATACCGGCTTTGAAAAAAGAGATGACTGGC
M3 rocA TCAAAGCAGTACTAAACAAGGACAAGATGATAGTCAAAGCGTGTGCTATACCGGCTTTGAAAAAAGAGATGACTGGC
*****

M1 rocA AATTTGACTTAAGGAATGTCACGACCATTTTAAATCGTTATGACTATCTCACAATTAGCTCGCAGATTTCATGATGGCATT
M3 rocA AATTTGACTTAAGGAATGTCACGACCATTTTAAATCGTTATGACTATCTCACAATTAGCTCGCAGATTTCATGATGGCATT
*****

M1 rocA TTAACCCAGTTAATAGAAATAGCTAAGCCTGACTGATGTTAAAGGTATGAATAACTCACTCAAATCAACTTAAGAGTCTG
M3 rocA TTAACCCAGTTAATAGAAATAGCTAAGCCTGACTGATGTTAAAGGTATGAATAACTCACTCAAATCAACTTAAGAGTCTG
*****

```

**Figure S2**  
**Alignment of the rocA genes from representative serotype M1 and M3 GAS isolates.** Red asterisks highlight nucleotide identity while gaps highlight differences. The start codons (ATG) are colored green while the stop codons (TAA or TGA) are colored red.

| Strain    | Serotype | Isolation year | Isolation location | <i>rocA</i> allele |
|-----------|----------|----------------|--------------------|--------------------|
| MGAS2221  | M1       | 1988           | Australia          | Wild-type          |
| MGAS1251  | M3       | 1920s          | UK                 | mutant             |
| MGAS1254  | M3       | 1937           | New York, USA      | mutant             |
| MGAS182   | M3       | 1940s          | Ottawa, Canada     | mutant             |
| MGAS1428  | M3       | 1974           | Cottbus, Germany   | mutant             |
| MGAS315   | M3       | 1980s          | Texas, USA         | mutant             |
| MGAS159   | M3       | Late 1980s     | Utah, USA          | mutant             |
| MGAS491   | M3       | Pre-1991       | UK                 | mutant             |
| SSI-1     | M3       | 1994           | Japan              | mutant             |
| MGAS9056  | M3       | 1998           | Illinois, USA      | mutant             |
| MGAS9507  | M3       | 2001           | Texas, USA         | mutant             |
| MGAS10870 | M3       | 2002           | Ontario, Canada    | mutant             |
| MGAS15049 | M3       | 2006           | Ontario, Canada    | mutant             |
| MGAS22283 | M3       | 2010           | Alberta, Canada    | mutant             |
| PGAS9429  | M12      | 2001           | Texas, USA         | Wild-type          |
| MGAS8232  | M18      | Prior to 2002  | Utah, USA          | mutant             |
| MGAS6180  | M28      | 1990s          | Texas, USA         | Wild-type          |

**Table S1**

**Clinical GAS isolates used in this study.**

| Strain                          | Serotype | Information                                                                                                                                          | Reference                    |
|---------------------------------|----------|------------------------------------------------------------------------------------------------------------------------------------------------------|------------------------------|
| 10870::rocA <sup>M1</sup>       | M3       | Derivative of clinical M3 GAS isolate MGAS10870 in which the mutant <i>rocA</i> allele has been replaced with a functional allele from M1 GAS        | This study                   |
| 10870::rocA <sup>M1-RV-M3</sup> | M3       | Derivative of M3 GAS isolate 10870::rocA <sup>M1</sup> in which the functional <i>rocA</i> allele has been reverted back to the M3 GAS allele        | This study                   |
| 10870ΔrocA                      | M3       | Derivative of clinical M3 GAS isolate MGAS10870 in which the mutant <i>rocA</i> allele has been replaced with a spectinomycin resistance cassette    | This study                   |
| 2221ΔrocA                       | M1       | Derivative of clinical M1 GAS isolate MGAS2221 in which the functional <i>rocA</i> allele has been replaced with a spectinomycin resistance cassette | This study                   |
| 2221rocA <sup>Comp</sup>        | M1       | Derivative of M1 GAS isolate 2221ΔrocA in which a functional <i>rocA</i> allele has been reintroduced by replacing the spectinomycin cassette        | This study                   |
| 2221ΔcovR                       | M1       | Derivative of clinical M1 GAS isolate MGAS2221 in which the <i>covR</i> gene has been replaced with a kanamycin resistance cassette                  | Treviño <i>et al.</i> , 2009 |
| 2221ΔrocAΔcovR                  | M1       | Derivative of 2221ΔcovR in which the <i>rocA</i> gene has been replaced with a spectinomycin resistance cassette                                     | This study                   |

**Table S2**  
**Derivatives of clinical GAS isolates used in this study.**

| Primer name | Sequence (5' - 3')                                     | Role                                                                                                                                                                                              |
|-------------|--------------------------------------------------------|---------------------------------------------------------------------------------------------------------------------------------------------------------------------------------------------------|
| UNR26       | TGTACAATTGCTAGCGTACGTAGAAAAGTTACTTAATCAAGCTTTTCG       | Used with UNR27, with M1 GAS gDNA as template, to PCR a region of <i>rocA</i> used in the creation of the plasmid to introduce a wild-type <i>rocA</i> into M3 GAS                                |
| UNR27       | CTATTATCATTAGTAATAGATTAAC                              | Used with UNR26, with M1 GAS gDNA as template, to PCR a region of <i>rocA</i> used in the creation of the plasmid to introduce a wild-type <i>rocA</i> into M3 GAS                                |
| UNR28       | GTTAATCTATTACTAATGATAATAG                              | Used with UNR29, with M3 GAS gDNA as template, to PCR a region of <i>rocA</i> used in the creation of the plasmid to introduce a wild-type <i>rocA</i> into M3 GAS                                |
| UNR29       | CAAAATTTTCATCAAGCTCTAGTTCGAATGCTTTGTGAGTCTCTTTGATGGTG  | Used with UNR28, with M3 GAS gDNA as template, to PCR a region of <i>rocA</i> used in the creation of the plasmid to introduce a wild-type <i>rocA</i> into M3 GAS                                |
| UNR30       | CGAAAAGCTTGATTAACTAACTTTTCTACGTACGCTAGCAATTGTACA       | Used with UNR31, with pBBL740 DNA as template, to PCR the plasmid. Was used in Gibson assembly to join with the PCR products made with UNR26/27 and UNR28/29                                      |
| UNR31       | CACCATCAAGAGACTCACAAGACTTCGAACACTAGAGCTTGATGAAAATTTG   | Used with UNR30, with pBBL740 DNA as template, to PCR the plasmid. Was used in Gibson assembly to join with the PCR products made with UNR26/27 and UNR28/29                                      |
| UNR32       | CCAGCCAATCATGCCAACCC                                   | Used with UNR39 to check that the <i>rocA</i> gene has been replaced with a <i>specR</i> cassette in strain 10870Δ <i>rocA</i>                                                                    |
| UNR33       | GCCATTCTATCTCCGCAGATAAGCTC                             | Used with UNR39 to check that the <i>rocA</i> gene has been replaced with a <i>specR</i> cassette in strain 10870Δ <i>rocA</i>                                                                    |
| UNR34       | CTATTTAAATAACAGATTAAAAAATATAACagtttaagaaatagctagcctgac | Used with UNR33, with M3 GAS gDNA as template, to amplify one flank of the <i>rocA</i> gene for construction of the M3 <i>rocA</i> inactivating plasmid (replacement with <i>Spec</i> cassette)   |
| UNR35       | gtcagcttagctatttctataactgTTATAATTTTTAACTGTTATTTAAATAG  | Used with UNR33, with M3 GAS gDNA as template, to amplify one flank of the <i>rocA</i> gene for construction of the M3 <i>rocA</i> inactivating plasmid (replacement with <i>Spec</i> cassette)   |
| UNR36       | CGTTATTAGTTAGTATTATAACATGATTtctcaaaaatgaagaaatcttc     | Used with UNR38, with M3 GAS gDNA as template, to amplify one flank of the <i>rocA</i> gene for construction of the inactivating plasmid (replacement with <i>Spec</i> cassette)                  |
| UNR37       | gaagatttctcaatttttaggaAATACATGTTATAAATACTATAACTAATAACG | Used with UNR35, with pS160 as template, to PCR the <i>specR</i> cassette and use in construction of the M3 <i>rocA</i> inactivating plasmid                                                      |
| UNR38       | GCTTTGACAAGCTTACTATGAGG                                | Used with UNR38, with M3 GAS gDNA as template, to amplify one flank of the <i>rocA</i> gene for construction of the inactivating plasmid (replacement with <i>Spec</i> cassette)                  |
| UNR39       | GTGGGGTTGGCTGATTGGCTTTCG                               | Used with UNR36, with M3 GAS gDNA as template, to amplify one flank of the <i>rocA</i> gene for construction of the inactivating plasmid (replacement with <i>Spec</i> cassette)                  |
| UNR26       | TGTACAATTGCTAGCGTACGTAGAAAAGTTACTTAATCAAGCTTTTCG       | Used with UNR29, with M3 GAS gDNA as template, to PCR <i>rocA</i> and use in the creation of the plasmid to revert the wild-type <i>rocA</i> in 10870::rocAM1 to the mutant M3 <i>rocA</i> allele |
| UNR29       | CAAAATTTTCATCAAGCTCTAGTTCGAATGCTTTGTGAGTCTCTTTGATGGTG  | Used with UNR26, with M3 GAS gDNA as template, to PCR <i>rocA</i> and use in the creation of the plasmid to revert the wild-type <i>rocA</i> in 10870::rocAM1 to the mutant M3 <i>rocA</i> allele |
| HASATMF     | ATGATCGATGTTTAAACAATTATGCTATTG                         | Taqman primer for <i>hasA</i>                                                                                                                                                                     |
| HASATMR     | TTAAATAACTTTTAAATTGGAAAGGTACATCAG                      | Taqman primer for <i>hasA</i>                                                                                                                                                                     |
| HASATMP     | ACGCACTGTCTACCAATCAACAGCTAGATGTG                       | Taqman probe for <i>hasA</i>                                                                                                                                                                      |
| PROSTMF     | TACCACTGGCAATCGTACC                                    | Taqman primer for <i>proS</i>                                                                                                                                                                     |
| PROSTM      | CATTTCAACAGCACCAGTCT                                   | Taqman primer for <i>proS</i>                                                                                                                                                                     |
| PROSTMP     | CACGCATGATGGCTTGAATTTCTCA                              | Taqman probe for <i>proS</i>                                                                                                                                                                      |
| SCPCTMF     | AAGGAGCTGGGCAAGGGATA                                   | Taqman primer for <i>scpC</i>                                                                                                                                                                     |
| SCPCTMR     | TGATGGCCGGATCGA                                        | Taqman primer for <i>scpC</i>                                                                                                                                                                     |
| SCPCTMP     | CAATAACTGCGACACCTTGCCTTGTCTCT                          | Taqman probe for <i>scpC</i>                                                                                                                                                                      |
| SLOTMF      | GACCTTTAAAGAGTTGCAACGAAAA                              | Taqman primer for <i>slo</i>                                                                                                                                                                      |
| SLOTMR      | GACCATAAGCTACGTTACTCACAAGA                             | Taqman primer for <i>slo</i>                                                                                                                                                                      |
| SLOTMP      | TGTCAGCAATGAAGCCCGCC                                   | Taqman probe for <i>slo</i>                                                                                                                                                                       |
| SPNTMF      | AACGCACTCTCTAAAGAAGACA                                 | Taqman primer for <i>spn</i>                                                                                                                                                                      |
| SPNTMR      | TGAATTTTCTCCGAGAAGTACTC                                | Taqman primer for <i>spn</i>                                                                                                                                                                      |
| SPNTMP      | TCATGTCATGCACACATTAGACGGCTCA                           | Taqman probe for <i>spn</i>                                                                                                                                                                       |
| SKATMF      | CGGCTCTTTGAGTCAATGATT                                  | Taqman primer for <i>ska</i>                                                                                                                                                                      |
| SKATMR      | CCGAACCATTTGTCCAGCAA                                   | Taqman primer for <i>ska</i>                                                                                                                                                                      |
| SKATMP      | CAAGCGATGCAACCACTTAGTATGATGAAAC                        | Taqman probe for <i>ska</i>                                                                                                                                                                       |
| ROCATMF     | AGGGCTATAGCGAAAGAA                                     | Taqman primer for <i>rocA</i>                                                                                                                                                                     |
| ROCATMR     | GGCTTCTTCCAGACCAAT                                     | Taqman primer for <i>rocA</i>                                                                                                                                                                     |
| ROCATMP     | TGAGCCAACATCACAACCAAGAAATG                             | Taqman probe for <i>rocA</i>                                                                                                                                                                      |

Table S3  
Table of primers and probes used in this study.

| Gene              | Expression ratio (10870::rocA <sup>M1</sup> / MGAS10870) |
|-------------------|----------------------------------------------------------|
| <i>hasA</i>       | 0.004                                                    |
| <i>hasB</i>       | 0.006                                                    |
| <i>hasC</i>       | 0.011                                                    |
| <i>spyCEP</i>     | 0.011                                                    |
| <i>mac</i>        | 0.021                                                    |
| <i>SpyM3_1493</i> | 0.043                                                    |
| <i>SpyM3_0305</i> | 0.050                                                    |
| <i>SpyM3_0105</i> | 0.068                                                    |
| <i>ska</i>        | 0.071                                                    |
| <i>SpyM3_0129</i> | 0.079                                                    |
| <i>nga</i>        | 0.084                                                    |
| <i>slo</i>        | 0.096                                                    |
| <i>sclB</i>       | 0.126                                                    |
| <i>scpA</i>       | 0.127                                                    |
| <i>arcC</i>       | 0.146                                                    |
| <i>SpyM3_1195</i> | 0.168                                                    |
| <i>mf4</i>        | 0.182                                                    |
| <i>SpyM3_1583</i> | 0.201                                                    |
| <i>sla</i>        | 0.205                                                    |
| <i>arcB</i>       | 0.205                                                    |
| <i>sagP</i>       | 0.220                                                    |
| <i>SpyM3_1193</i> | 0.226                                                    |
| <i>SpyM3_1192</i> | 0.232                                                    |
| <i>SpyM3_0157</i> | 0.236                                                    |
| <i>speA3</i>      | 0.252                                                    |
| <i>SpyM3_0158</i> | 0.260                                                    |
| <i>SpyM3_1203</i> | 0.261                                                    |
| <i>SpyM3_0307</i> | 0.263                                                    |
| <i>SpyM3_0742</i> | 0.282                                                    |
| <i>SpyM3_0408</i> | 0.330                                                    |
| <i>SpyM3_1759</i> | 0.333                                                    |
| <i>SpyM3_1161</i> | 3.083673469                                              |
| <i>SpyM3_1509</i> | 3.105280528                                              |
| <i>ropB</i>       | 3.123188406                                              |
| <i>SpyM3_1020</i> | 3.204597701                                              |
| <i>SpyM3_0025</i> | 3.234782609                                              |
| <i>purK</i>       | 3.394444444                                              |
| <i>SpyM3_0467</i> | 3.419230769                                              |
| <i>SpyM3_1061</i> | 3.521705426                                              |
| <i>SpyM3_0402</i> | 3.543801653                                              |
| <i>speB</i>       | 3.61                                                     |
| <i>purM</i>       | 3.744444444                                              |
| <i>agaS</i>       | 4.072222222                                              |
| <i>SpyM3_0793</i> | 4.11                                                     |
| <i>purN</i>       | 4.180952381                                              |
| <i>purF</i>       | 4.627184466                                              |
| <i>grab</i>       | 4.75907208                                               |
| <i>purC</i>       | 5.075384615                                              |
| <i>asnA</i>       | 5.156716418                                              |
| <i>SpyM3_0591</i> | 5.709134615                                              |
| <i>purD</i>       | 5.711176471                                              |
| <i>purL</i>       | 6.199264706                                              |
| <i>rpsU</i>       | 7.663265306                                              |
| <i>purH</i>       | 8.196551724                                              |
| <i>metB</i>       | 11.35205479                                              |
| <i>kup</i>        | 12.95283019                                              |

**Table S4**

**Genes whose transcript levels differ three-fold or greater between parental M3 isolate MGAS10870 and the *rocA* complemented derivative 10870::rocA<sup>M1</sup>.**
